# Supplementary material for: Utilization of a novel digital measurement tool for quantitative assessment of upper extremity motor dexterity: a controlled pilot study
Source: PubMed Central journal article supplement (PMC4138400; doi:10.1186/1743-0003-11-121), 2014-08-13

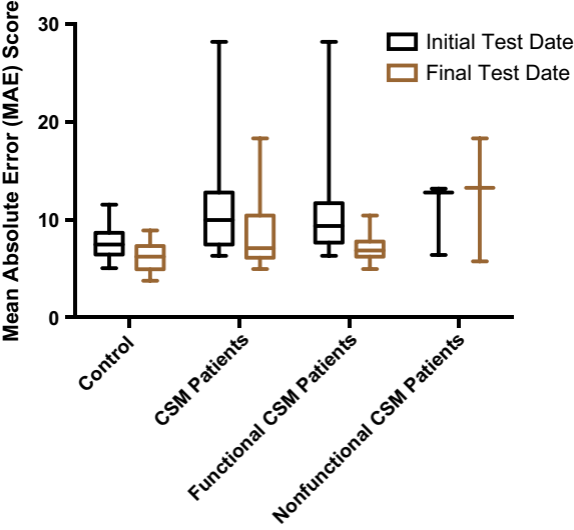

Supplement: 12984_2013_642_MOESM5_ESM.pdf [file 12984_2013_642_MOESM5_ESM.pdf]
